# Supplementary material for: Glycosylation engineering of spinosyn analogues containing an l-olivose moiety
Source: Royal Society of Chemistry journal article supplement (doi:10.1039/b900233b), 2009-01-01
Supplement: b900233b.pdf [file b900233b.pdf]

SUPPLEMENTARY INFORMATION

## **Glycosylation engineering of spinosyn analogues containing an L-olivose moiety**

Sabine Gaisser,<sup>a,§</sup> Isabelle Carletti,<sup>a</sup> Ursula Schell,<sup>a</sup> Paul R. Graupner,<sup>b</sup> Clive Waldron,<sup>b</sup>

Thomas C. Sparks,<sup>b</sup> Christine J. Martin<sup>a</sup> and Barrie Wilkinson<sup>a,\*</sup>

<sup>a</sup>*Biotica Technology Ltd, Chesterford Research Park, Cambridge, CB10 1XL, UK*

<sup>b</sup>*Dow AgroSciences, Indianapolis, IN 46268, USA*

\* Authors to whom correspondence should be addressed: [barrie.wilkinson@biotica.com](mailto:barrie.wilkinson@biotica.com)

§ Current address: Hochschule Biberach, Karlstraße 11, 88400 Biberach/Riß, Germany

Keywords: Spinosyn, glycosylation, biosynthetic engineering

## SUPPLEMENTARY INFORMATION

### *General Methods*

*E. coli* DH10B (GibcoBRL) were grown in 2TY medium as described elsewhere.<sup>1</sup> Vectors pUC19 and Litmus 28 were obtained from New England Biolabs. *E. coli* transformants were selected with ampicillin (100  $\mu\text{g cm}^{-3}$ ). *S. erythraea* strains were cultured as described previously<sup>2</sup> unless expressly described otherwise below. Plasmid-containing *S. erythraea* were selected with thiostrepton (40  $\mu\text{g cm}^{-3}$ ). DNA manipulations, PCR and electroporation procedures were carried out using standard procedures.<sup>1</sup> Protoplast formation and transformation procedures of *S. erythraea* were as described previously.<sup>2,3</sup>

### *Construction of pSG146\_T28 (see Figure S1)*

pSG144<sup>4</sup> was digested with *SpeI* and *NdeI* to remove the *actII*-ORF4 activator and the bi-directional  $P_{actIII}/P_{actI}$  promoter. The promoter for resistance to pristinamycin  $P_{pr}$ <sup>5</sup> was self-amplified using the overlapping oligos Prs1 and Prs2 (Table S1), and cloned as a *SpeI/NdeI* fragment into the above digested pSG144 to generate pSG146. pSG146 was introduced into the genome of *S. erythraea* via the 'eryRHS' fragment, which is a neutral chromosomal site adjacent to the erythromycin biosynthetic cluster, as described elsewhere.<sup>4</sup>

Biosynthetic gene cassettes were assembled in a manner analogous to that used previously.<sup>4</sup> All DNA generated by PCR amplification was sequenced to confirm the integrity of the genes. Gene 1 (*ermE*) was amplified by PCR (*S. erythraea* NRRL2338 genomic DNA as template, oligos in Table S1) and cloned into pSG146 as an *NdeI/XbaI* fragment (this additionally removes *eryBV* present in this plasmid). Gene 2 (*tylAI*) was

## SUPPLEMENTARY INFORMATION

amplified by PCR (*S. fradiae* ATCC19609 genomic DNA as template, oligos in Table S1) and cloned into a conversion vector to provide a ribosome binding site up-stream of the start codon, and an *XbaI* site that is methylated when plasmid DNA is isolated from *E. coli* DH10B, but not methylated when plasmid DNA is isolated from a *dam*<sup>-</sup> *E. coli* strain such as ET12567.<sup>6</sup> *TylAI* with the upstream RBS is then cloned on an *XbaI* fragment (plasmid DNA being isolated from ET12567) into *XbaI*-digested pSG146ermE. This leaves a single *XbaI* site available for insertion of the next gene. Gene 3 (*tylAII*) was amplified and cloned similarly to *tylAI* (oligos in Table S1).

The genes *spnO* and *spnN* were isolated on a single DNA fragment by PCR amplification using the appropriate oligos (Table S1) and genomic DNA from *Saccharopolyspora spinosa* NRRL18395. This fragment was cloned into pSG146 downstream of the P<sub>ptr</sub> promoter. A *SpeI/XbaI* fragment containing *spnO* and *spnN* along with the upstream P<sub>ptr</sub> was then isolated and cloned into the single available *XbaI* site that is not methylated downstream from *tylAII*, again leaving a single available *XbaI* (the ligation of *SpeI* to *XbaI* eliminates both sites). Similarly, *spnP* is amplified and cloned (this time as an *NdeI/BglIII* fragment) into pSG146 such that it could then be added as the final gene of the cassette along with the upstream P<sub>ptr</sub> as a *SpeI/BglIII* fragment to generate pSG146\_T28.

SUPPLEMENTARY INFORMATION

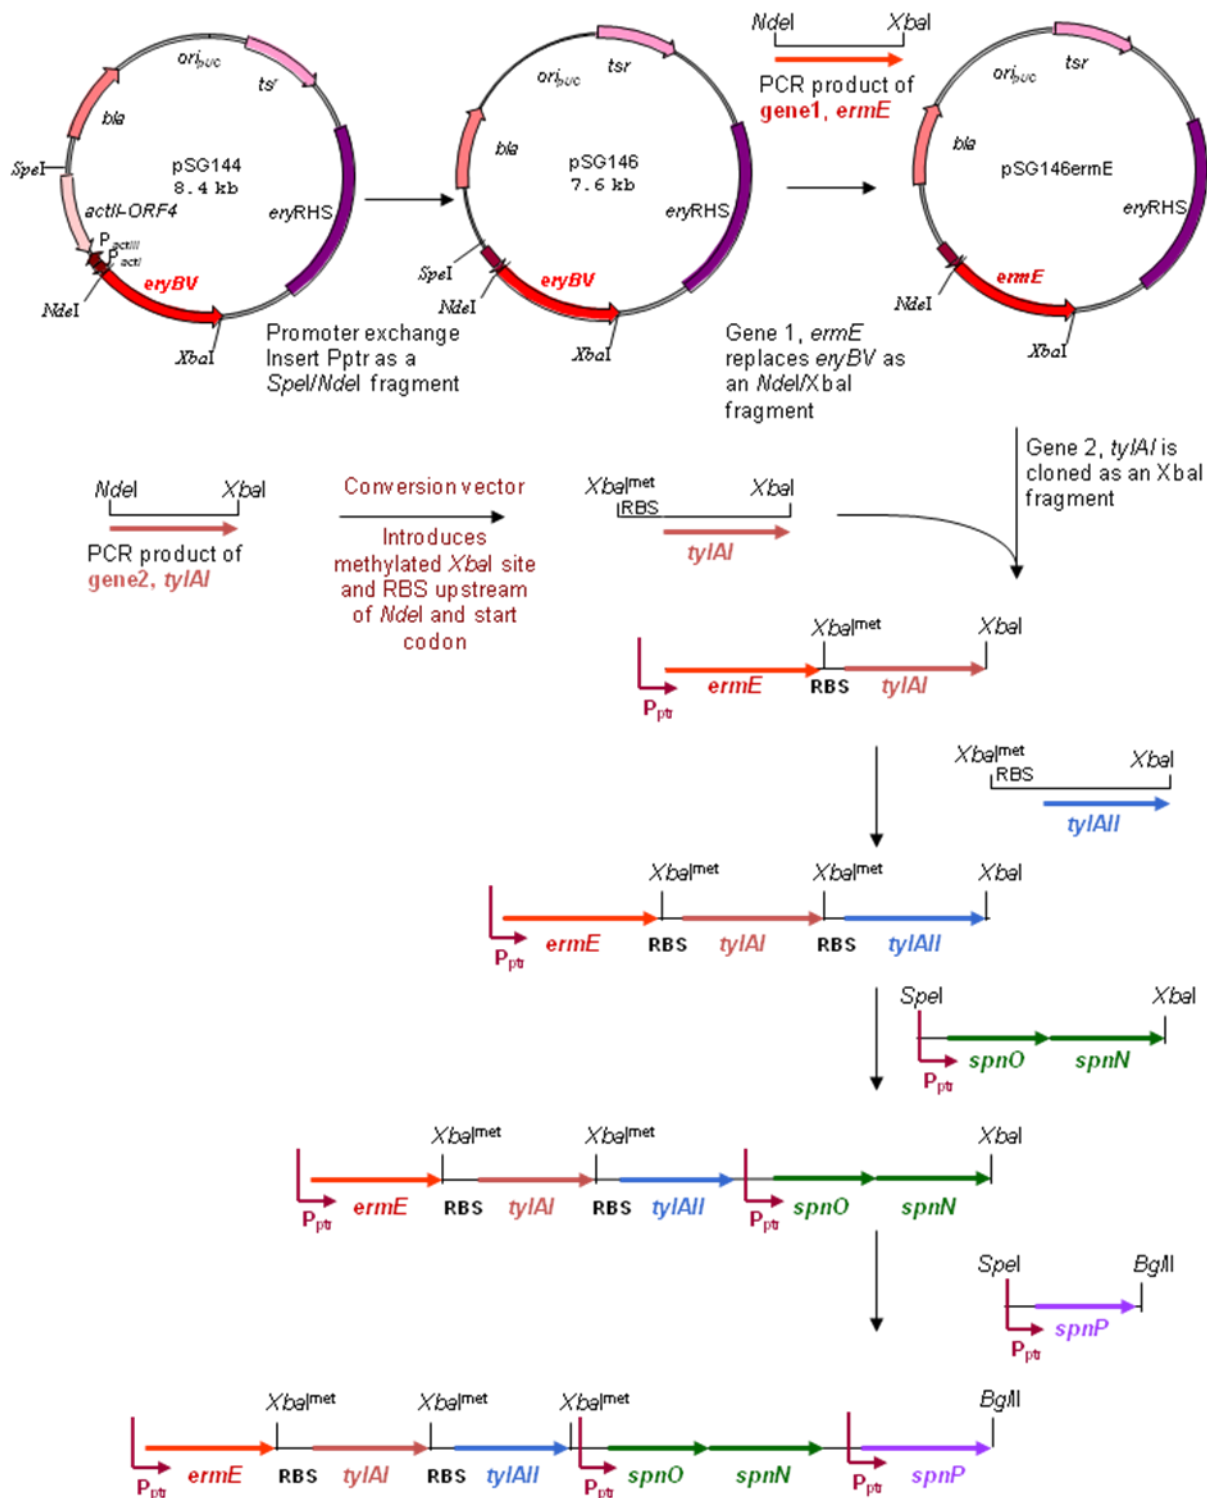

Figure S1

SUPPLEMENTARY INFORMATION

**Table S1**

| Oligo name | Sequence 5'-3'                                                                                |
|------------|-----------------------------------------------------------------------------------------------|
| Pris1      | GGG GAA TTC ACT AGT CCG CGG AGA AAT AGC GCT GTA CAG CGT ATG<br>GGA ATC TCT TGT ACG G          |
| Pris2      | GGG GGA TCC CAT ATG GGC TCC TTG TAC GGT GTA CGG GAA GAT ACT<br>CGT ACA CCG TAC AAG AGA TTC CC |
| ermEfor    | GGG CAT ATG AGC AGT TCG GAC GAG CAG CCG CGC CCG CGT                                           |
| ermErev    | GGG GTC TAG AGG TCA CCG CTG CCC GGG TCC GCC GCG TCG CCC TGG                                   |
| tylAIfor   | GGG CAT ATG AAC GAC CGT CCC CGC CGC GCC ATG AAG GG                                            |
| tylAIrev   | CCC CTC TAG AGG TCA CTG TGC CCG GCT GTC GGC GGC GGC CCC GCG<br>CAT GG                         |
| tylAIIfor  | GGG CAT ATG CGC GTC CTG GTG ACC GGA GGT GCG GGC TTC                                           |
| tylAIIrev  | CCC CTC TAG AGG TCA TGC GCG CTC CAG TTC CCT GCC GCC CGG GGA<br>CCG CTT G                      |
| spnO+Nfor  | GGG CAT ATG AGC AGT TCT GTC GAA GCT GAG GCA AGT                                               |
| spnO+Nrev  | GGT CTA GAG GTC ATG TGG ACC CGC ACC GAC GGG CCT GAC                                           |
| spnPfor    | TCG GAT CCC ATA TGC GTG TCC TGT TCA CCC CGC T                                                 |
| spnPrev    | GTA GAT CTC GGA TGG CCA TCA GAC TGC CCA                                                       |

SUPPLEMENTARY INFORMATION

**Table S2.** NMR data for **9** acquired in CDCl<sub>3</sub> at 500 (<sup>1</sup>H) and 125 (<sup>13</sup>C) MHz. <sup>1</sup>H-<sup>1</sup>H COSY and <sup>1</sup>H-<sup>13</sup>C HMBC correlations are given.

| Position              | δ <sub>c</sub> | δ <sub>H</sub> (mult., Hz)     | H-H COSY         | H-C HMBC                 |
|-----------------------|----------------|--------------------------------|------------------|--------------------------|
| 1                     | 172.3          | -                              | -                | -                        |
| 2                     | 34.4           | 3.12 m<br>2.41 (dd, 13.5, 3.0) | 2b<br>2a         | 1, 3, 4<br>1, 3          |
| 3                     | 49.6           | 2.89 (ddt, 10.8, 8.8, 2.6)     | 4, 13            | 12, 14                   |
| 4                     | 41.5           | 3.45 (dd, 9.3, 3.3)            | 3, 5, 6, 12      | 6, 12                    |
| 5                     | 129.4          | 5.87 (bd, 9.7)                 | 4, 6             | 4, 7, 11                 |
| 6                     | 128.9          | 5.77 (dt, 9.8, 2.8)            | 4, 5, 7          | 3, 4, 7                  |
| 7                     | 41.1           | 2.17 m                         | 6, 8, 11         | -                        |
| 8                     | 36.5           | 1.93 (dd, 13.5, 6.6)<br>1.34 m | 7<br>-           | 7, 9, 10<br>7, 9         |
| 9                     | 76.3           | 4.30 m                         | 8,10a            | 1', 7                    |
| 10                    | 37.5           | 2.25 m<br>1.32 m               | 9, 10b, 11<br>11 | 7, 8, 11<br>7, 9         |
| 11                    | 46.3           | 0.89 m                         | 7, 11            | 7, 10                    |
| 12                    | 47.6           | 3.03 m                         | 4, 13            | -                        |
| 13                    | 147.7          | 6.77 br s                      | 3,12             | 3, 4, 12, 14, 15         |
| 14                    | 147.3          | -                              | -                | -                        |
| 15                    | 202.0          | -                              | -                | -                        |
| 16                    | 46.9           | 3.29 (dt, 6.9, 2.7)            | 17, 24           | 15, 17, 24               |
| 17                    | 83.1           | 3.72 m                         | 16, 18           | 1''                      |
| 18                    | 34.4           | 1.66 m<br>1.54 m               | 17               | -                        |
| 19                    | 20.6           | 1.55 m                         | 20a              | 20                       |
| 20                    | 30.8           | 1.69 m<br>1.37 m               | 19<br>21         | 21                       |
| 21                    | 75.9           | 4.67 m                         | 20b, 22          | -                        |
| 22                    | 27.9           | 1.56 m<br>1.49 (qm 7.3)        | 21, 23           | 20, 21, 23<br>20, 21, 23 |
| 23                    | 9.3            | 0.82 (t, 7.5)                  | 22               | 21, 22                   |
| 24                    | 17.3           | 1.19 (d, 6.9)                  | 16               | 15, 16, 17               |
| 1'                    | 95.7           | 4.83 (d, 1.7)                  | 2'               | 9, 3'', 5''              |
| 2'                    | 77.8           | 3.50 m                         | 1'               | -                        |
| 3'                    | 81.1           | 3.47 m                         | 4'               | -                        |
| 4'                    | 82.3           | 3.11 m                         | 3', 5'           | -                        |
| 5'                    | 68.0           | 3.53 m                         | 4', 6'           | -                        |
| 6'                    | 17.8           | 1.27 (d, 6.3)                  | 5'               | 4'', 5''                 |
| O-CH <sub>3</sub> -2' | 59.0           | 3.48 s                         | -                | 2'                       |
| O-CH <sub>3</sub> -3' | 57.6           | 3.49 s                         | -                | 3'                       |
| O-CH <sub>3</sub> -4' | 60.8           | 3.54 s                         | -                | 4'                       |
| 1''                   | 99.9           | 4.95 (d, 3.6)                  | 2''              | 17, 3'', 5''             |

SUPPLEMENTARY INFORMATION

|     |      |                                                   |          |          |
|-----|------|---------------------------------------------------|----------|----------|
| 2'' | 35.4 | 2.21 (ddd, 14.5, 3.6, 0.8)<br>1.91 (dd 14.5, 6.9) | 1'', 3'' | 3'', 4'' |
| 3'' | 67.3 | 3.95d (6.9)                                       | 2'', 4'' | 5''      |
| 4'' | 72.6 | 3.12 (dd, 9.2, 9.7)                               | 3'', 5'' | 6''      |
| 5'' | 65.1 | 3.79 (dq, 9.7, 6.3)                               | 4'', 6'' | 4''      |
| 6'' | 17.6 | 1.29 (d, 6.3)                                     | 5''      | 4'', 5'' |

**References**

- 1 J. Sambrook, E. F. Fritsch and T. Maniatis, *Molecular cloning: a laboratory manual*, Cold Spring Harbor Laboratory Press, New York, New York, 2nd edn., 1989.
- 2 S. Gaisser, G. A. Böhm, J. Cortés and P. F. Leadlay, *Mol. Gen. Genet.*, 1997, **256**, 239-251.
- 3 K. Salah-Bey, M. Doumith, J. -M. Michel, S. F. Haydock, J. Cortés, P. F. Leadlay and M. -C. Raynal, *Mol. Gen. Genet.*, 1998, **257**, 542-553.
- 4 U. Schell, S. F. Haydock, A. L. Kaja, I. Carletti, R. E. Lill, E. Read, L. S. Sheehan, L. Low, M.-J. Fernandez, F. Grolle, H. A. I. McArthur, R. M. Sheridan, P. F. Leadlay, B. Wilkinson and S. Gaisser, *Org. Biol. Chem.*, 2008, **6**, 3315-3327.
- 5 V. Blanc, K. Salah-Bey, M. Folcher and C. J. Thompson, *Mol. Microbiol.* 1995, **17**, 989-999.
- 6 F. Flett, V. Mersinias and C. P. Smith, *FEMS Microbiol. Lett.* 1997, **155**, 223-229.
